# Supplementary material
Source: Elsevier journal article supplement (https://www.sciencedirect.com/science/article/pii/S1579212917301246)
Supplement: mmc1 [file S1579212917301246:mmc1.docx]

**INTERVENCIÓN SOBRE EL CONDUCTOR DE RIESGO. CONSEJO SANITARIO**

La intervención sobre el conductor de riesgo, más allá del mero control sobre su permiso de conducción y la reducción del periodo de vigencia, debe ir encaminada a que el sujeto conozca su problema de salud y las consecuencias del mismo sobre su seguridad, sobre la de terceras personas, y especialmente sobre su actividad como conductor. El consejo sanitario ofrecido en la misma línea y desde los diferentes ámbitos de la salud, (UDS, atención primaria, CRC), refuerza la prevención y ayuda al conductor a entender las restricciones aplicadas en su permiso de conducir.

- Deben ser advertidos del riesgo de accidentes de tráfico
- Evitar la conducción hasta el diagnóstico definitivo
- Evitar la conducción hasta comprobar la efectividad del tratamiento (CPAP u otros)
- Importancia del seguimiento y de la adhesión al tratamiento
- Vigilancia y consejo sobre las enfermedades asociadas

Aspectos fundamentales en el consejo

- Dormir las horas adecuadas disminuye el riesgo de accidentes.
- Cumplimiento de los horarios laborales y de descanso, prestando especial atención a la deprivación de sueño.
- El SAHS no es una enfermedad profesional, pero los accidentes durante el trabajo ligados a la somnolencia son accidentes de trabajo.
- Los conductores profesionales conocen bien la relación entre las apneas de sueño y los accidentes, pero tienden a ocultar que padecen esta enfermedad por miedo a las repercusiones laborales.
- El conductor deberá tener confianza en que las decisiones basadas en el criterio de seguridad serán analizadas con respeto
- El empresario debe saber que el respeto de las normas de seguridad redundara en el beneficio de la empresa.

Otros consejos médicos

- Advertir sobre el consumo de alcohol y/o otros fármacos que incrementan la somnolencia y por tanto el riesgo.
- Advertir sobre la necesidad de mantener un ritmo de sueño normal.
- Consejo sobre alimentación y actividad física, y otros hábitos de vida saludables, si el conductor es obeso o padece alguna otra patología de la que haya evidencia sobre su relación directa con la somnolencia. Promover la conducción en horas de menos somnolencia.
- Es importante que todos los implicados en el proceso diagnóstico conozcan la legislación al respecto y se informe sobre la misma a los pacientes con el fin de que sean conscientes de la responsabilidad que asumen en el caso de ocultar su enfermedad.

**CONSIDERACIONES SOBRE EL ACCIDENTE DE TRÁFICO POR SOMNOLENCIA**

El accidente se produce porque:

- 1. no se reconocen los signos de fatiga o somnolencia.
  2. se reconocen y no se les presta atención, llegando a padecer una somnolencia peligrosa.
  3. no se actúa adecuadamente.

Es de gran interés educar a los pacientes en el reconocimiento precoz de los síntomas de somnolencia y advertirle que tiene que interrumpir la conducción cuando note los primeros síntomas:

- lucha por mantener los ojos abiertos
- visión borrosa
- cabezadas
- dificultad para el mantenimiento trayectoria
- dificultad para mantener la velocidad correcta
- pensamiento cambiante
- lentitud reacciones
- bostezos y movimientos en el asiento

**RESPUESTAS A ALGUNAS PREGUNTAS DE CONDUCTORES QUE PADECEN SAHS**

- *¿Puedo conducir si dejo de usar el CPAP durante un fin de semana?*

No es seguro abandonar el tratamiento sobre todo si se asocian otras situaciones normalmente más frecuentes durante el fin de semana: consumo de alcohol, la alteración de los hábitos de sueño o la trasgresión dietética. Estos aspectos asociados incrementan el número de apneas y los riesgos de reaparición de síntomas de sueño o cansancio diurno.

- *¿Puedo conducir si dejo de usar el CPAP por una noche?*

La eficacia del tratamiento en el control de síntomas depende del uso y nunca se recomienda usar menos de 5 días por semana y menos de 5 horas por noche.

- *¿Por cuánto tiempo debería estar en tratamiento antes de que pueda conducir de manera segura?*

Hasta que su especialista considere controlado el proceso y así se lo indique.

- *¿Cuántas horas de CPAP por noche me permitirá conducir con seguridad?*

En general un uso superior a 5 horas/ noche.

- *¿Con CPAP, puedo llevar con seguridad a los niños a la escuela?*

Si no tiene síntomas, y cumple el tratamiento su seguridad es la misma que la de una persona sin apneas de sueño. Recuerde que tener excesivo sueño diurno puede tener otras causas, siendo la fundamental los malos hábitos de sueño en número de horas.

- *Mi situación ha mejorado y ahora mi índice de apnea / hipopnea es 15/hora. El especialista me dice que no necesito tratamiento con CPAP. ¿Puedo seguir conduciendo de manera segura?*

Existen personas que tienen apneas y no tienen síntomas y en estos casos el riesgo con la accidentabilidad no es concluyente. Su médico especialista en sueño le puede aclarar estos supuestos
